# Supplementary material
Source: PubMed Central journal article supplement (PMC11589949)
Supplement: NIHPP2024.10.24.620127v4-supplement-1.pdf [file NIHPP2024.10.24.620127v4-supplement-1.pdf]

1353 **Supplementary figures**

1354

Figure S1

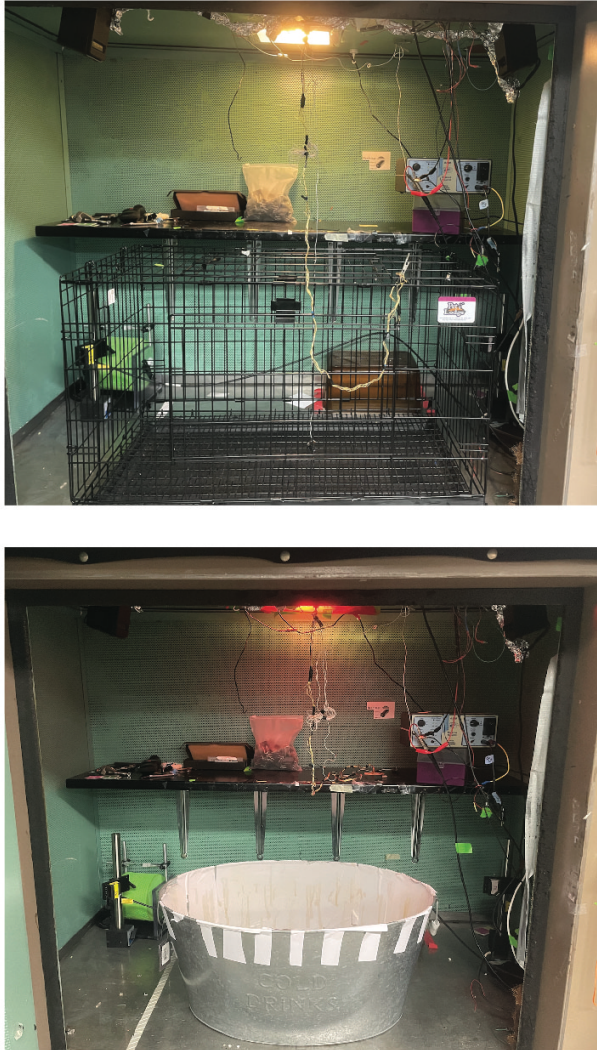

1355

1356 **Figure S1. Photos of testing chambers.**

1357 Photos of testing chambers. Top: Environment A, an unscented rectangular enclosure with wire  
1358 floor and walls, and white lighting. Bottom: Environment B, a scented ovular enclosure with  
1359 white solid floor and walls, and red lighting. Both environments were located at the same spot in  
1360 the room relative to external cues. The door to the chamber was closed during testing, to  
1361 accentuate the distinction between the white and red lighting.

Figure S2

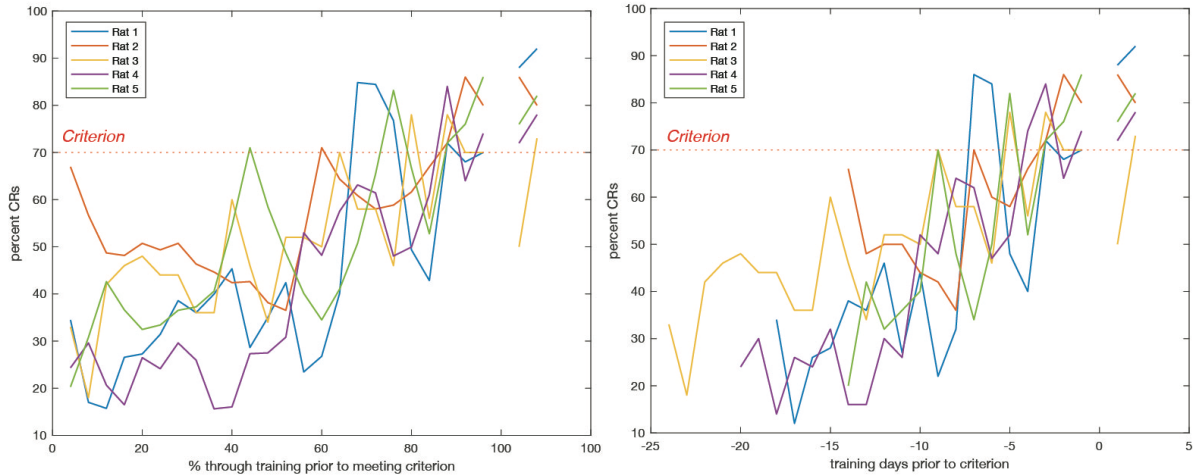

1362

1363 **Figure S2. Learning curves for the five rats.**

1364 Substantial variability in the number of sessions required to learn the task; average number of  
1365 sessions was  $20 \pm 4.2$  (including the criterion sessions). The fastest learners (2 rats) reached  
1366 criterion after 14 sessions, while the slowest rat required 24 sessions to reach criterion.

Figure S3

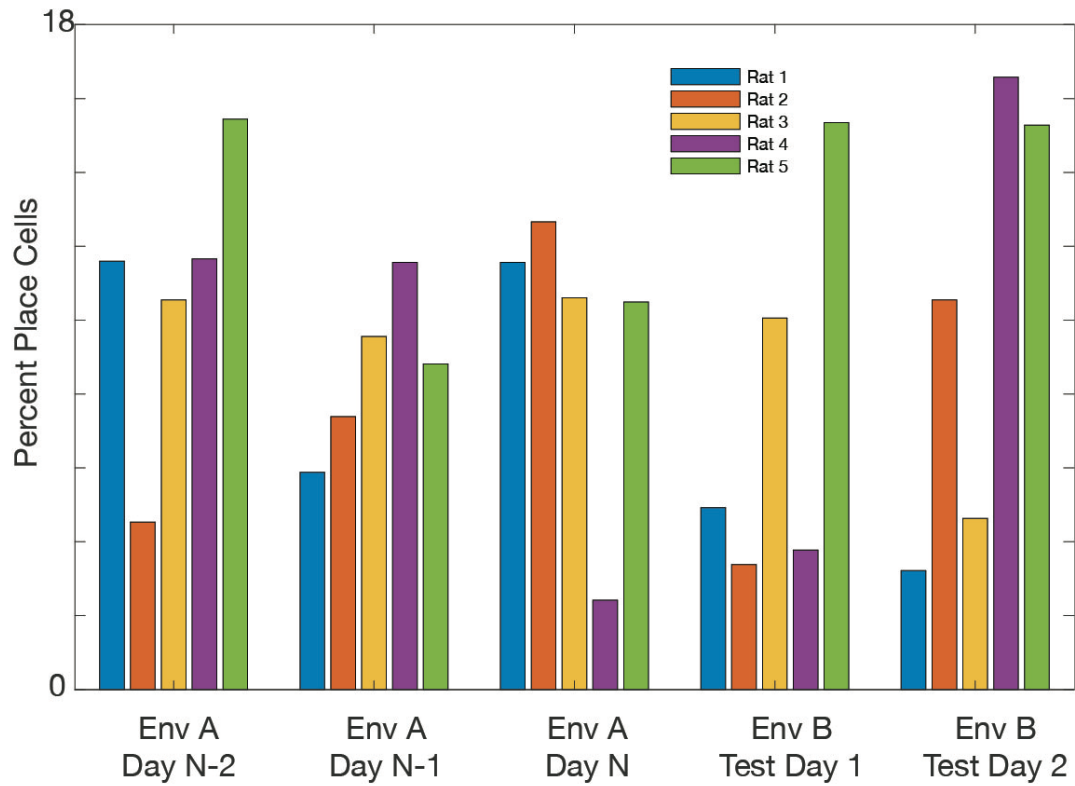

1367

1368 **Figure S3. Percent of place cells by session for each animal.**

1369 The percentage of cells classified as place cells for each session and each animal

Figure S4

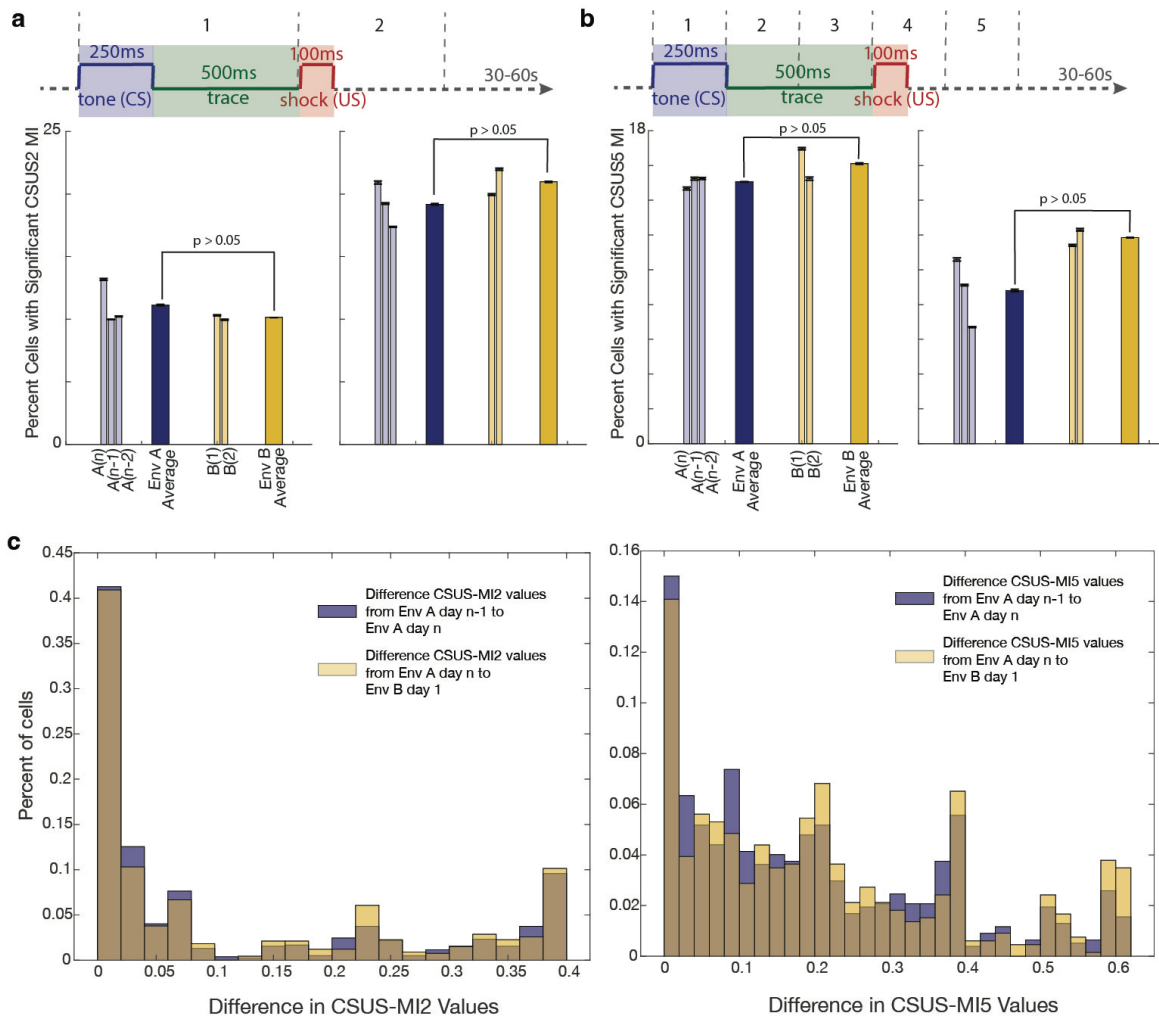

1370

1371 **Figure S4. CSUS-MI2 and CSUS-MI5 differences between sessions.**

1372 **a.** The trial period was divided into two segments: the CS and trace period (750 ms) and the  
 1373 US and post-US period (500 ms). Mutual information (MI) was calculated for cells based  
 1374 on these two periods and compared to shuffled data, where period IDs were shuffled 500  
 1375 times across all trials. Left: Using calcium event data, we found that  $10.7\% \pm 4.9\%$  of  
 1376 cells contained significant CSUS information related to whether the animal was in a CS  
 1377 or US period. Right: Using calcium traces,  $19.9\% \pm 8.2\%$  of cells contained significant  
 1378 information distinguishing the CS from the US period. No significant differences in

1379 CSUS-MI were observed between environments A and B (double-sided t-tests, calcium  
1380 events:  $t(23) = 0.48$ ,  $p > 0.05$ ; calcium traces:  $t(23) = -0.52$ ,  $p > 0.05$ ).

1381 **b.** The trial period was divided into five equal segments, each 250 ms. MI was calculated  
1382 for each cell based on these five periods. We compared the observed values to those  
1383 obtained after shuffling period IDs 500 times. Left: Using calcium event data,  $15.5\% \pm$   
1384  $7.8\%$  of cells contained significant information distinguishing the five periods, compared  
1385 to  $10.0\% \pm 7.8\%$  when using calcium trace data. No significant differences in these MI  
1386 metrics were found between environments A and B (double-sided t-tests, calcium events:  
1387  $t(23) = -0.32$ ,  $p > 0.05$ ; calcium traces:  $t(23) = -1.1$ ,  $p > 0.05$ ).

1388 **c.** Left: There was no significant difference in CSUS-MI2 values when comparing session  
1389 A(n) to session A(n-1) versus session A(n) to session B(1) (Wilcoxon rank sum test:  $p >$   
1390  $0.05$ ; double-sided t-test:  $t(1431) = 0.86$ ,  $p > 0.05$ ). Right: A small but significant  
1391 difference was observed in CSUS-MI5 when comparing session A(n) to session A(n-1)  
1392 versus session A(n) to session B(1) (Wilcoxon rank sum test:  $p = 0.049$ ; double-sided t-  
1393 test:  $t(1431) = -2.2$ ,  $p = 0.03$ ).

1394

Figure S5

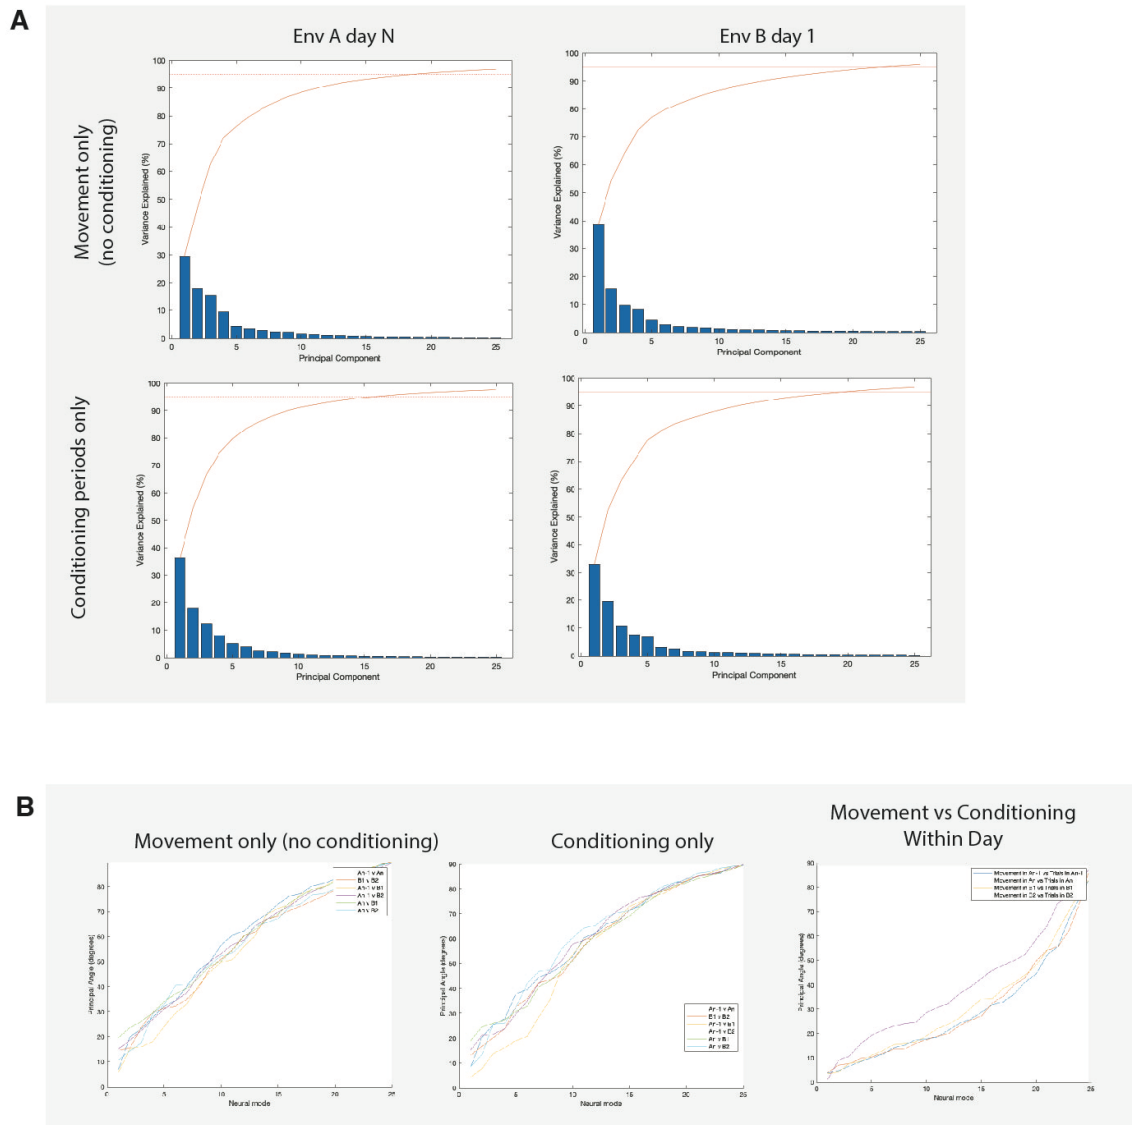

1395

1396 **Figure S5. PCA computations for session A(n) and session B(1).**

1397 Only cells present in both sessions were used. Principal component analysis (PCA) revealed that  
1398 approximately 15-25 principal components (PCs) are needed to account for 95% of the variance  
1399 in the data. When using the complete cell population (not shown), more than 25 PCs are required  
1400 to achieve the same variance. Across and within all sessions and representations (spatial and  
1401 task), the principal angles between manifolds remain highly similar.

Figure S6

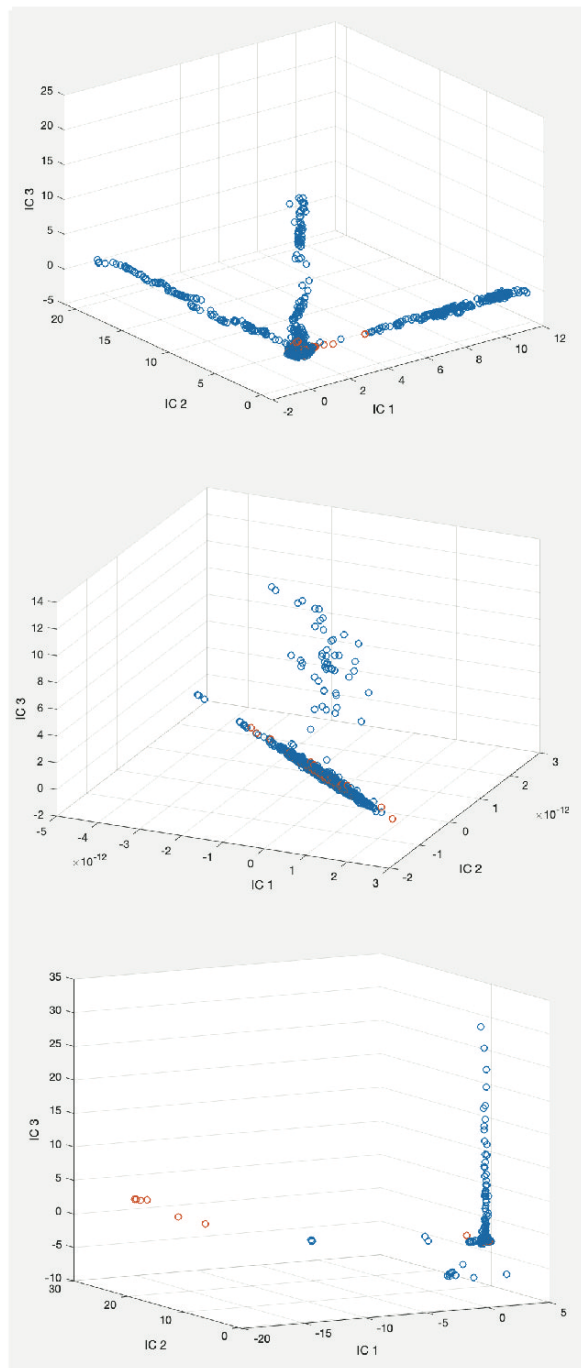

1402

1403 **Figure S6. ICA computations across different segments of a session.**

1404 Top: Independent component analysis (ICA) was for data over an entire session, using three  
1405 independent components (ICs). Blue dots represent non-trial times, while red dots represent trial  
1406 times. Middle: ICA computed over the last two-thirds of the same session shows variability in

1407 ICs across segments within a session. Bottom: ICA computed over the second half of the session  
1408 shows additional variability in the results of the analysis depending on how the session is  
1409 divided. These results indicate that independent components are highly variable over the course  
1410 of one session and are sensitive to how the session is partitioned.  
1411



Figure S7

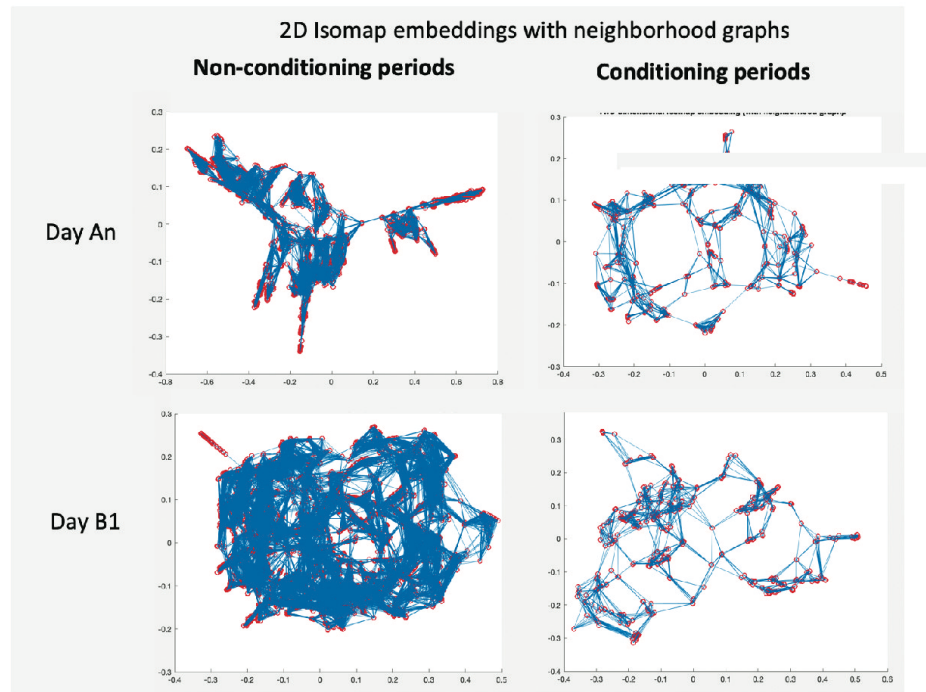

1412

1413 **Figure S7. Isomap computations for session A(n) and session B(1).**

1414 Isomap computations suggest that approximately five neural modes are sufficient to achieve a  
1415 residual variance of 5-10%. However, the shape of the Isomap embedding does not correlate  
1416 with any discernable properties of neural activity or behavior, suggesting limited interpretability  
1417 of the embedding structure.

Figure S8

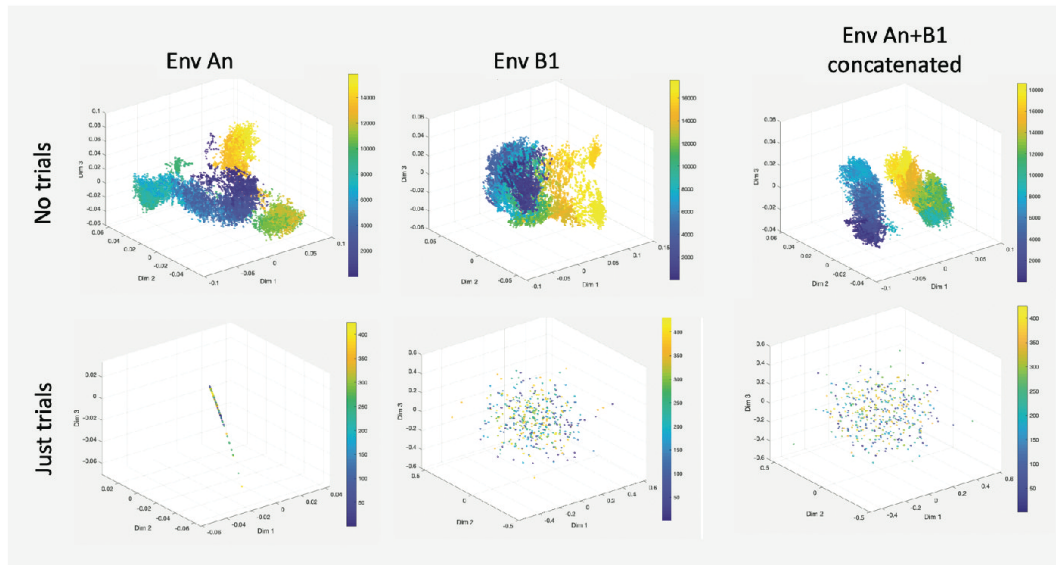

1418

1419 **Figure S8. MIND outputs for sessions A(n), B(1), and concatenated sessions.**

1420 Top row: MIND embeddings during movement, excluding trial periods, with color bars

1421 representing frames. The temporal structure of the data is well captured, with clear separation

1422 between A(n) and B(1). Bottom row: MIND embeddings during conditioning periods are highly

1423 unstable. Small changes in parameters result in substantial shifts in the embedding structure,

1424 transitioning from a linear structure (left) to an undefined, unstable cloud (middle and right).

1425

Figure S9

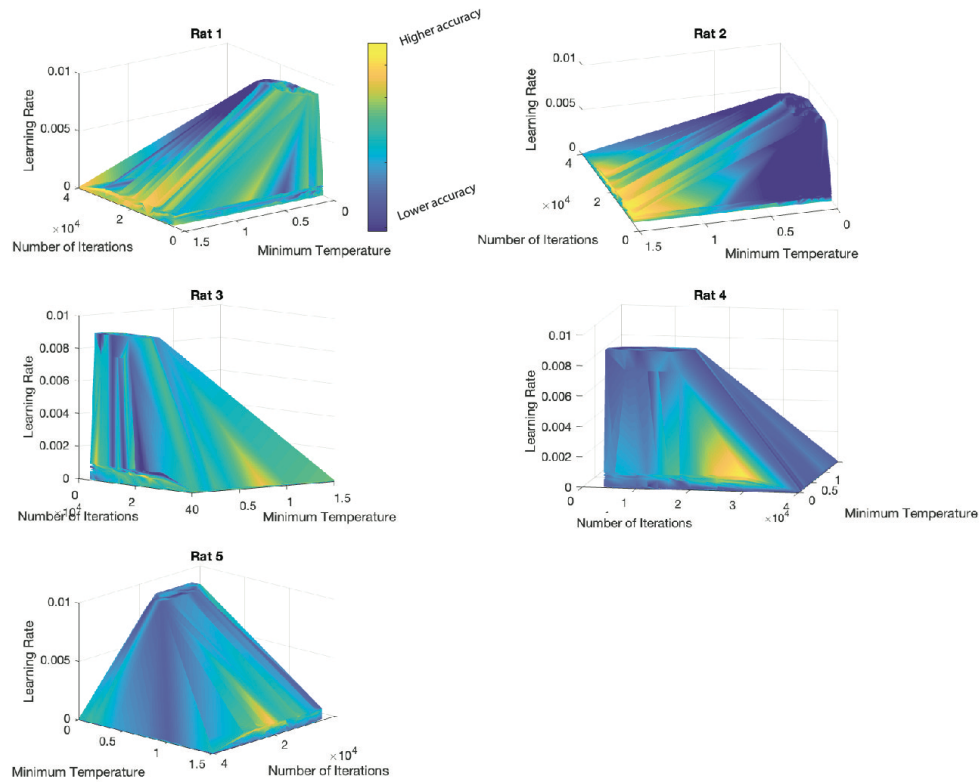

1426

1427 **Figure S9. Grid search over decoding parameters for position.**

1428 A grid search was performed over three parameters: minimum temperature, learning rate, and  
1429 number of iterations, for decoding position. Models were trained using cells from session A(n)  
1430 that also appeared in session A(n-1). The figure shows decoding accuracy for session A(n-1)  
1431 using the models trained on data from session A(n). Yellow areas indicate higher decoding  
1432 accuracy.

Figure S10

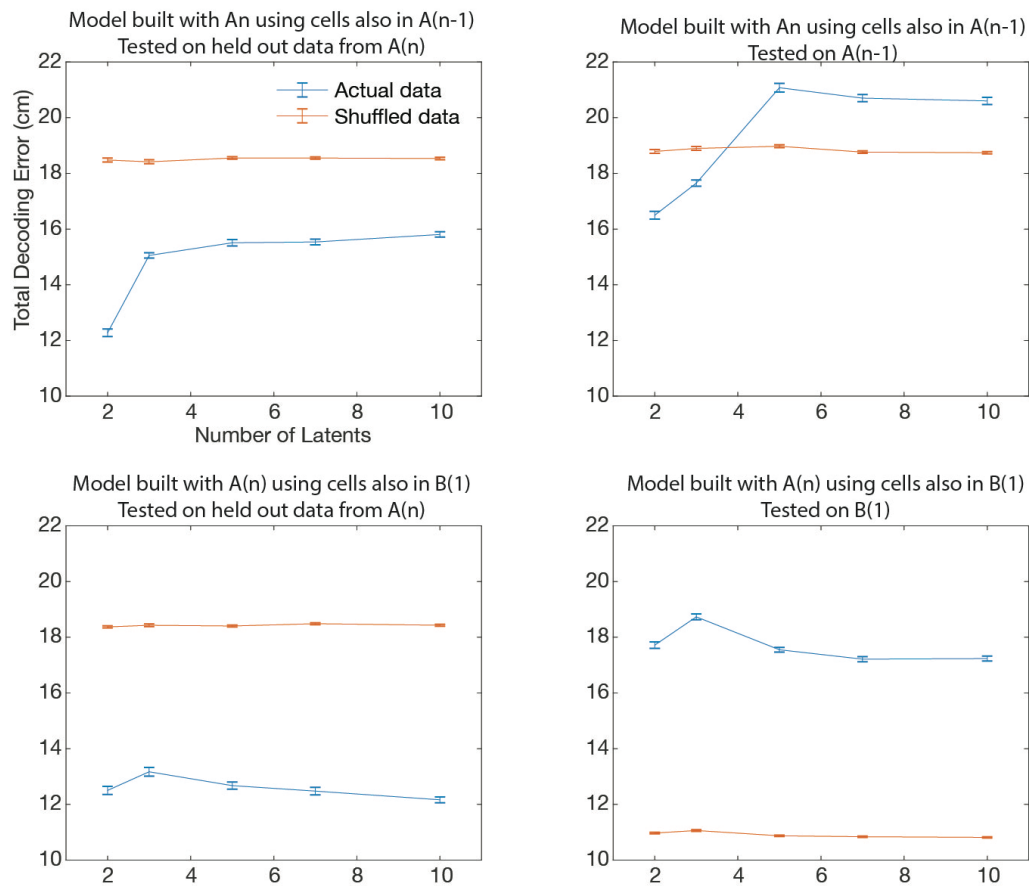

1433

1434 **Figure S10. Position decoding error as a function of the number of latents (Rat 5).**

1435 This figure shows the decoding error for position as the number of latents increases. Left panels:

1436 model trained on data from A(n), tested on held out data from A(n). Upper left panel: As the

1437 number of latents increases, the model's ability to decode a different session within the same

1438 environment decreases. This effect is not consistent across all rats; see lower left panel. Right

1439 panels: model trained on data from A(n), tested on A(n-1) (top) or B(1) (bottom). Performance is

1440 particularly bad when the model is tested on a different environment (lower right panel).

Figure S11

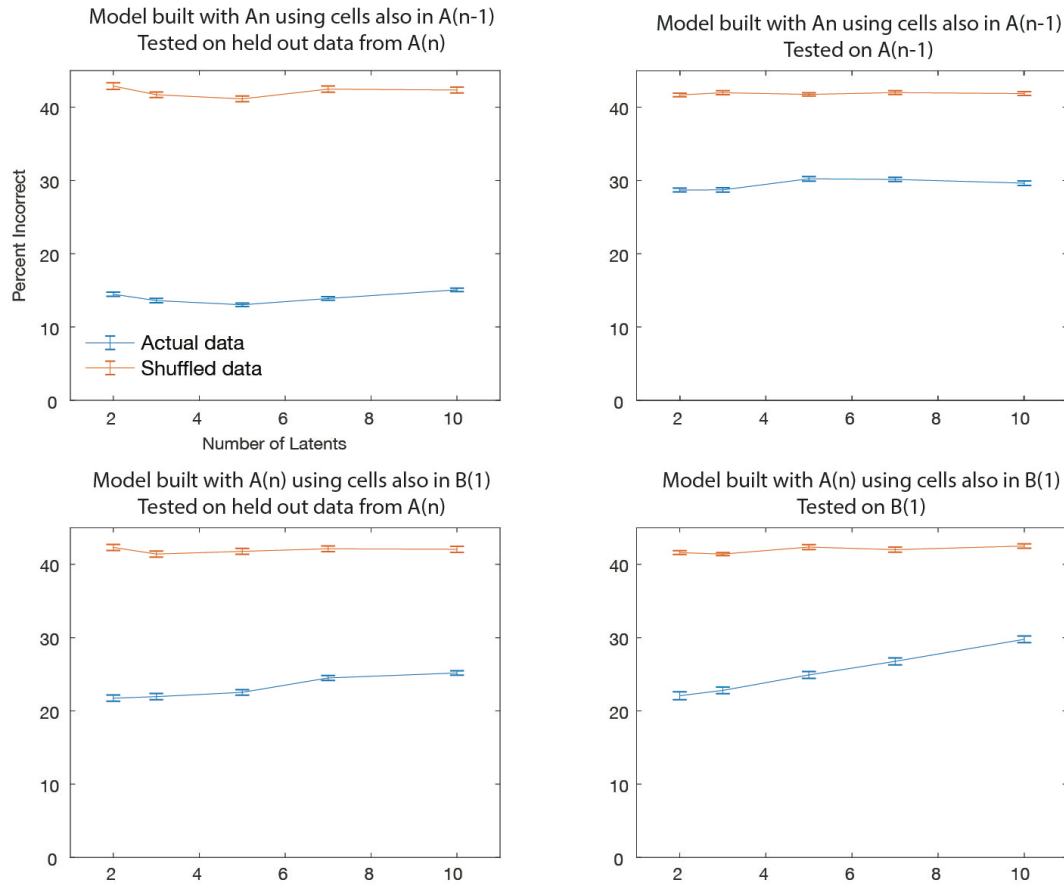

1441

1442 **Figure S11. CSUS2 decoding accuracy with increasing number of latents (Rat 3).**

1443 Percent of incorrect decoding for the CSUS2 model as the number of latents increases. Left  
1444 panels: model trained on data from A(n), tested on held out data from A(n). As the number of  
1445 latents increases, the model's ability to decode a different session within the same environment  
1446 remains stable or slightly decreases. Right panels: model trained on data from A(n), tested on  
1447 A(n-1) (top) or B(1) (bottom). Performance remains stable for a different session in the same  
1448 environment (upper right panel) but deteriorates with increasing number of latents when the  
1449 model is tested in a different environment (lower right panel). Each model was run 100 times.

Figure S12

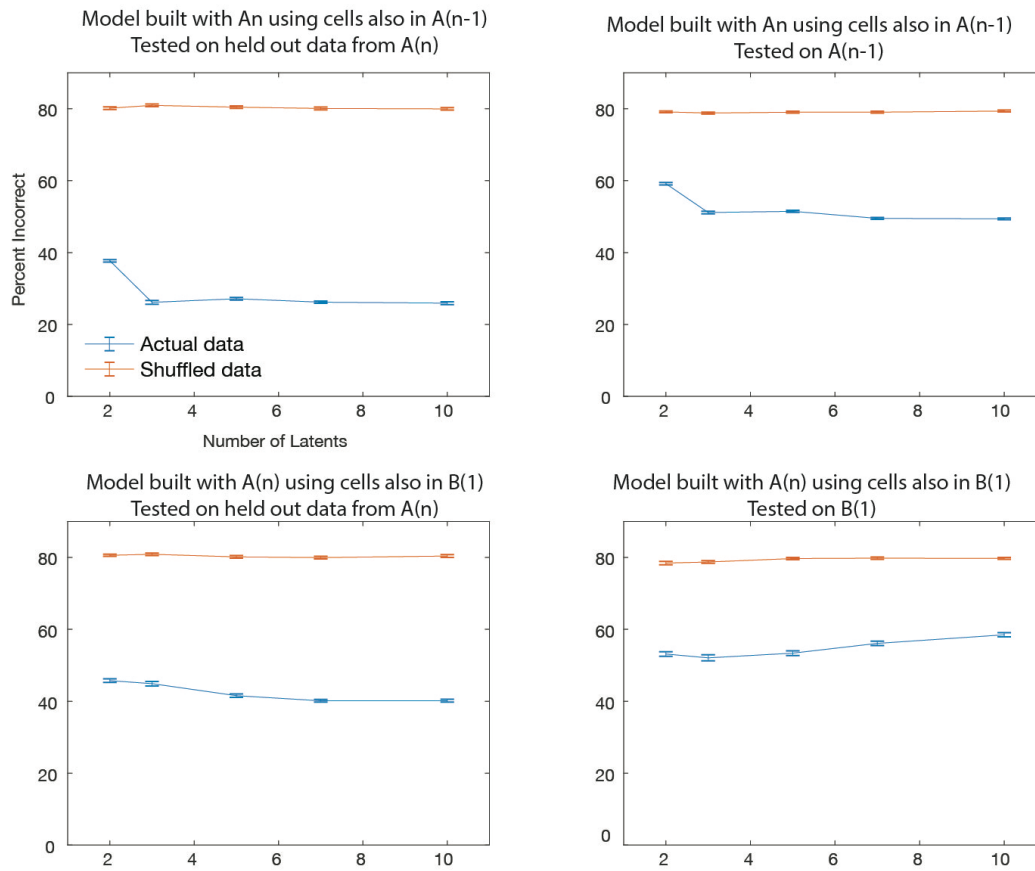

1450

1451 **Figure S12. CSUS5 decoding accuracy with increasing number of latents (Rat 5).**

1452 Same as Figure S11, but for CSUS5; the conditioning period has been divided into five time bins  
1453 instead of two. The percent of incorrect decoding is shown as the number of latents increases.

1454 Left panels: model trained on data from A(n), tested on held out data from A(n). As the number

1455 of latents increases, the model's ability to decode a different session within the same environment

1456 remains stable or slightly increases. Right panels: model trained on data from A(n), tested on

1457 A(n-1) (top) or B(1) (bottom). Performance remains stable for a different session in the same

1458 environment (upper right panel) but deteriorates with increasing number of latents when the

1459 model is tested in a different environment (lower right panel). Each model was run 100 times.

1460

Figure S13

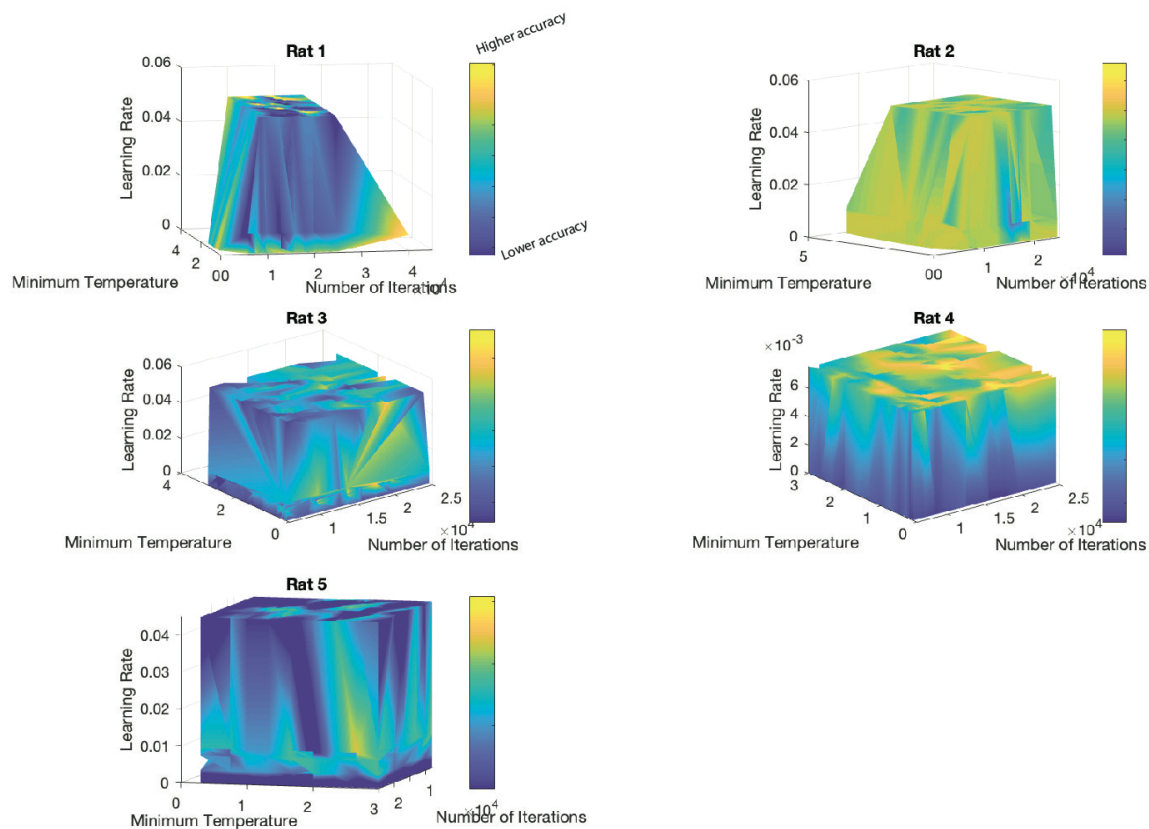

1461

1462 **Figure S13. Grid search over decoding parameters for conditioning.**

1463 A grid search was performed over three parameters: minimum temperature, learning rate, and  
1464 number of iterations for conditioning decoding. Models were trained using cells from session  
1465 A(n) that also appeared in session B(1). The figure shows decoding accuracy for CSUS2 session  
1466 B(1) using the models trained on data from session A(n). Yellow areas indicate higher decoding  
1467 accuracy. For Rats 1 and 4, the 'Euclidean' distance with 'constant' temperature mode was used.  
1468 For Rats 2 and 5, 'cosine' distance with 'constant' temperature mode was used. For Rat 3, 'cosine'  
1469 distance with 'auto' temperature mode was used.

1470

1471
